# Supplementary material for: Urine-derived exosomes from individuals with IPF carry pro-fibrotic cargo
Source: eLife journal article supplement (doi:10.7554/elife.79543), 2022-10-31
Supplement: data1 [file elife-79543-data1-v1.pdf]

**Supplement 1 source data:** Primers (either sequence or catalog numbers), antibodies

| Primer details (ABI)   |      | Gene Expression number         |                                         |
|------------------------|------|--------------------------------|-----------------------------------------|
| <b>RNA</b>             |      | <b>Human</b>                   | <b>Mouse</b>                            |
| <i>ERα</i>             | qPCR | Hs00607062_gh                  | Mm00433143_m1                           |
| <i>ERβ</i>             | qPCR | Hs01100353_m1                  | Mm00442411_m1                           |
| <i>TGFβ</i>            | qPCR | Hs00998133_m1                  | Mm01178820_m1                           |
| <i>Collagen type I</i> | qPCR | Hs00164004_m1                  | Mm00801666_g1                           |
| <i>IGFR</i>            | qPCR | Hs00609566_m1                  |                                         |
| <i>I8s</i>             | qPCR | Hs99999901_s1                  | Mm03928990_g1                           |
| <b>microRNA</b>        |      | <b>Forward</b>                 | <b>Reverse universal primer for all</b> |
| Let-7d                 |      | GGGACGAGAGGTAGTAGGTTGC         |                                         |
| 29a-5p                 |      | TGATTCTTTTGGTGTTCAGAAA         |                                         |
| 34a-5p                 |      | GGCAGTGTCTTAGCTGGTTGTAAAA      |                                         |
| 142-3p                 |      | CGCCATGTAGTGTTTCCTACTTT        |                                         |
| 199a-3p                |      | CAGTAGTCTGCACATTGGTTAAAAA      |                                         |
| 181b-5p                |      | CGACGACGAACATTCATTGC           |                                         |
| U6                     |      | GCAAATTCGTGAAGCGTTCC           |                                         |
| <b>Antibodies</b>      |      | <b>Company</b>                 | <b>Catalog number</b>                   |
| CD63                   |      | System Biosciences             | Exoab-cd63A-1                           |
| pAKT                   |      | Cell Signaling                 | 9271                                    |
| AKT                    |      | Santa Cruz Biotechnology, Inc. | Sc-1619                                 |
| c-jun                  |      | Santa Cruz Biotechnology, Inc. | Sc-74543                                |

|                                 |                                |                                              |
|---------------------------------|--------------------------------|----------------------------------------------|
| Caveolin-1                      | Cell Signaling                 | 3267                                         |
| ER $\alpha$                     | Santa Cruz Biotechnology, Inc. | Human (H184) sc-7207<br>Mouse (MC-20) sc-542 |
| SPC                             | Abcam                          | Ab40879                                      |
| $\alpha$ -SMC                   | Abcam                          | Ab8211                                       |
| Dapi containing mounting medium | Vectorshield                   | H-1200                                       |
