# Supplementary material for: Urine-derived exosomes from individuals with IPF carry pro-fibrotic cargo
Source: eLife. 2022 Dec 1;11:e79543. doi: 10.7554/eLife.79543 (PMC9714968; doi:10.7554/eLife.79543)
Supplement: Figure 3—source data 1. [file elife-79543-fig3-data1.xlsx]

## Sheet: Fig2A-E
	Fig. 2A	qPCR - Let-7D/U6 % of control exosomes					Fig. 2C	qPCR - miR29a-5p/U6 % of control exosomes
	Control	IPF					Control	IPF
	122.502	57.47					48.133	25.294
	116.644	78.958					81	26.0061
	87.9998	66.7893					125.138	6.38598				Fig. 2E	serum vs urine relative expression
	97.98	51.9591					86.8595	45.2932				Let 7D			miR-29			miR-199			miR-181
	121.87	99.38					159.34	17.2337				serum	urine		serum	urine		serum	urine		serum	urine
	98.1432	18.8031					73.716	77.8163				0.63	0.5		0.04	0.38		0.15	0.07		0.31	0.22
	35.5876	25.7525					60.2785	122.782				0.77	0.34		0.05	0.02		0.04	0.11		0.21	0.1
	182.837	38.2143					106	75				0.52	0.7		0.05	0.05		0.11	0.08		0.54	0.2
		122.809										0.86	0.64		0.07	0.56		0.13	0.06		0.19	0.28
												0.54	0.76		0.03	0.04		0.08	0.04		0.22	0.42
	Fig. 2B	qPCR - miR199-3p/U6 % of control exosomes					Fig.2D	qPCR - miR29a-5p/U6 % of control exosomes	181b/U6 % of control exosomes
	Control	IPF					Control	IPF
	176	344.178					117.362	16.3053
	50	131.894					137.75	17.0818
	75.7979	221.211					128	50.3901
	45.3714	103.193					35.7	32.4291
	73.2022	546					78.5	72.6
	117.645	83.4988					89.7867	15.7
	118.017	133.195					108.582	5.00107
	69.3169	186.601					169	34.0751
		151.635						9.54058
		873
