# Supplementary material for: Urine-derived exosomes from individuals with IPF carry pro-fibrotic cargo
Source: eLife. 2022 Dec 1;11:e79543. doi: 10.7554/eLife.79543 (PMC9714968; doi:10.7554/eLife.79543)
Supplement: Figure 7—source data 1. [file elife-79543-fig7-data1.xlsx]

## Sheet: Fig 6 
Fig. 6A	human lung punch								urine exosomes							Fibroblast derived exosomes
mRNA	integrin		mRNA type 1 collagen
control	IPF		control	IPF		Fig.6D	mRNA integrin			Fig.6E	mRNA collagen type I									Fig.6J	mRNA integrin
99	193		99	132		PBS	control	IPF		PBS	control	IPF								PBS	control	IPF
101	144		101	163		99.9682	128.593	245.951		100.758	87.9041	175.607								100	226	262
						99.9954	149.82	418.901		100.003	27.8639	223.621								99.9811	114	283
						99.9696	33.3273	272.365		100	84.3291	261.494								99.9853	126	562
						99.9963		443.83		100.06	73.1399	759.966
								635.772		99.8847	157.064	1060.33
	human lung punch											190.186								Fig.6K	mRNA collagen type I
Fig. 6B	Caveolin-1 protein expression											274.646									PBS	control	IPF
cell	PBS	control	IPF			Fig. 6F	ERα protein expression														100.215	173.483	470.678
	100	249	41			PBS	control	IPF													99.9917	53.8574	262.662
		116	58			100	63.5164	139.884															162.5
urine		control	IPF			101	100	120													100.001	100	179
		108	96			99	94.1064	157.801															181
		100	62				105.894	174.429
																	Fig.6L	ERα protein expression
	human lung punch																PBS	control	IPF
	urine derived exosomes																100	151.617	298
Fig. 6C	ERα protein expression																100	226	414			Fig.6M
PBS	Control	IPF															101	87	320			c-Jun protein expression
100	91	500																				PBS	control	IPF
99	142	459				Fig. 6G	c-Jun protein expression			Fig.6H	pAKT protein expression											101	166.058	435
						PBS	control	IPF		PBS	control	IPF										99	32	934
						100	31.2399	701.742		100	104	180										100	186	483
							215.005	469.589		99	82	160										100	92.5587
						99	100	378.867		101	142.273	172.727
						100	79.3355	123.621
								Fig.6I	MMP-9 activity
								PBS	control	IPF
								100	103.228	123.281
								99	64.8368	116.597
									49.933	120.454
								100	83	194.448
										130.599
