# Supplementary material for: Urine-derived exosomes from individuals with IPF carry pro-fibrotic cargo
Source: eLife. 2022 Dec 1;11:e79543. doi: 10.7554/eLife.79543 (PMC9714968; doi:10.7554/eLife.79543)
Supplement: Figure 8—source data 1. [file elife-79543-fig8-data1.xlsx]

## Sheet: Fig 7
	Fig. 7A
		percent epitheliazation
	PBS	Control	IPF
	110	30	16
	87	35	14
	98	23	16
		22	13
			14
			11
			16
