# Supplementary material for: Urine-derived exosomes from individuals with IPF carry pro-fibrotic cargo
Source: eLife. 2022 Dec 1;11:e79543. doi: 10.7554/eLife.79543 (PMC9714968; doi:10.7554/eLife.79543)
Supplement: Figure 9—figure supplement 1—source data 1. [file elife-79543-fig9-figsupp1-data1.xlsx]

## Sheet: Fig 8 
												Fig. 8 supplement 1	collagen content ug/mg of tissue
												PBS	IPF	Control
												7.93	7.63	7.1
												4.97	6.95	7.37
												7.29	12.32	8.04
												7.95	11.55	6.26
													10.94	8.29
													12.32	9.83
													11.55
													10.94
