# Supplementary material for: Urine-derived exosomes from individuals with IPF carry pro-fibrotic cargo
Source: eLife. 2022 Dec 1;11:e79543. doi: 10.7554/eLife.79543 (PMC9714968; doi:10.7554/eLife.79543)
Supplement: Figure 9—source data 1. [file elife-79543-fig9-data1.xlsx]

## Sheet: Fig 8 
		Fig. 8M	Ashcroft score
		Bleomycin	Control	IPF	Bronchietasis	Asthma
		3.06	3.77	3.29	3.06	3.44
		3.38	3.35	4.13	3.68	2.76
		3.39	3.48	3.61	3.32	2.74
		2.71	3.18	4.54		2.88
		3.61	2.39	3.68		3.97
		3.52	2.29	4.5
		Fig. 8N	collagen content ug/mg of tissue
		Bleomycin	Control	IPF	Bronchietasis	Asthma
		8.05	9.16	11.78	6.84	5.57
		11.74	8.7	12.73	5.19	6.31
		11.44	8.87	13.66	5.21	6.86
		8.77	11.73	11.59	6.82	4.42
		6.55	9.16	11.53		5.97
		9.81	8.59	11
			9.55	12.09
				11.26
				11.33
		Fig. 8O	Integrin mRNA/18s
		Bleomycin	Control	IPF	Bronchietasis	Asthma
		12	8.6	21.47	5.33	13.87
		6.14	6.7	32.05	16.73	20.95
		14.74	13.65	10.21	24.66	27.4
		11.23	10.89	31.76	10.43	16.48
		11.6	14.91	16.81		11.76
		11.04		23.04
				23.73
