# Supplementary material for: Urine-derived exosomes from individuals with IPF carry pro-fibrotic cargo
Source: eLife. 2022 Dec 1;11:e79543. doi: 10.7554/eLife.79543 (PMC9714968; doi:10.7554/eLife.79543)
Supplement: Source data 2. [file elife-79543-data2.zip]

Archive with 7 entries (7 files):
- Raw undedited gels source file/Fig 6G akt full gels.pdf
- Raw undedited gels source file/Figure 6F cjun full gel.pdf
- Raw undedited gels source file/Figure 6H MMP full gel.pdf
- Raw undedited gels source file/Figure 6k ERa full gel.pdf
- Raw undedited gels source file/Figure 6L cjun full gel.pdf
- Raw undedited gels source file/Figure 6L ERa fibroblast full gel.pdf
- Raw undedited gels source file/Figure 6M cjun fibroblast full gel.pdf
